# Supplementary material for: Genomic Surveillance of SARS-CoV-2 Variants in the Dominican Republic and Emergence of a Local Lineage
Source: MDPI journal article supplement (doi:10.3390/ijerph20085503), 2023-04-13
Supplement: s1 [file s1]

**Figure S1.** Scorpio call SARS-CoV-2 variant assignment over time. Data represents 186 different data collection date and 1,149 sequences.

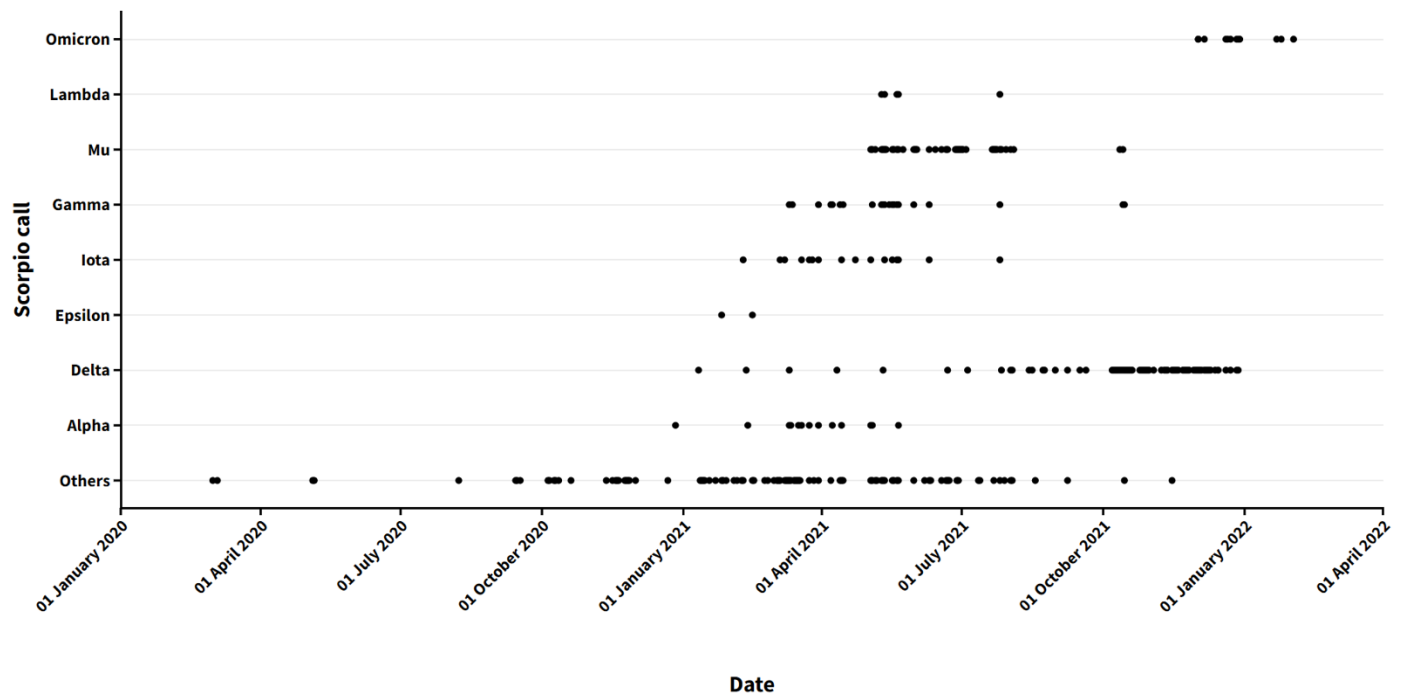

**Figure S2.** Pangolin lineage of SARS-CoV-2 variant assignment over time. Data represents 186 different data collection date and 1,149 sequences.

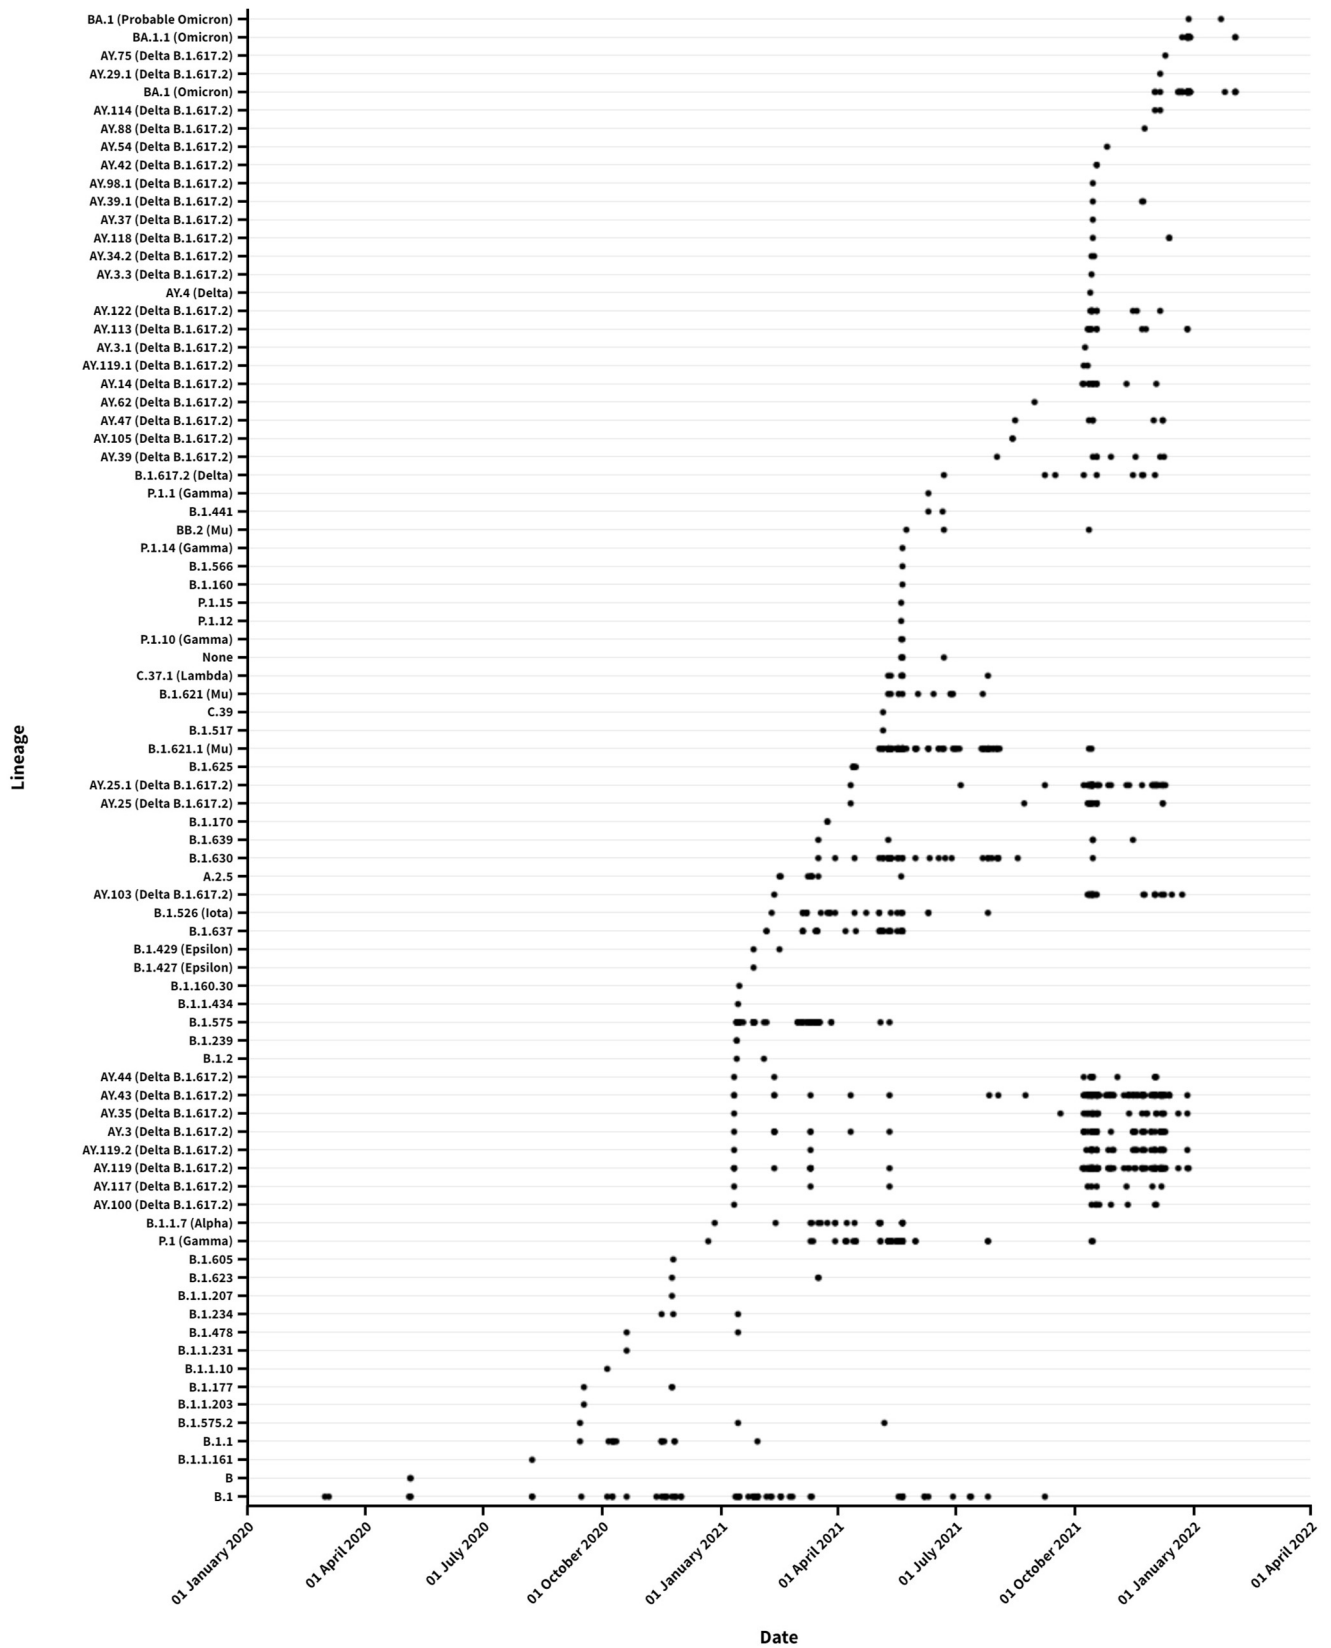

**Table S1.** Accession numbers of the sequences used in the study. All genome sequences used in this study are published in GISAID's data base with the following identifiers: GISAID Identifier: EPI\_SET\_230302bt doi: [10.55876/gis8.230302bt](https://doi.org/10.55876/gis8.230302bt); EPI\_SET\_230302kx doi: [10.55876/gis8.230302kx](https://doi.org/10.55876/gis8.230302kx); EPI\_SET\_230302qv doi: [10.55876/gis8.230302qv](https://doi.org/10.55876/gis8.230302qv).

| Accession ID    | Sample Collection Date |
|-----------------|------------------------|
| EPI_ISL_6897916 | 10/7/21                |
| EPI_ISL_6897924 | 10/8/21                |
| EPI_ISL_6897928 | 10/8/21                |
| EPI_ISL_6897936 | 10/8/21                |
| EPI_ISL_6897944 | 10/8/21                |
| EPI_ISL_6897949 | 10/9/21                |
| EPI_ISL_6897952 | 10/11/21               |
| EPI_ISL_6897959 | 10/11/21               |
| EPI_ISL_6897962 | 10/11/21               |
| EPI_ISL_6897963 | 10/11/21               |
| EPI_ISL_6897970 | 10/11/21               |
| EPI_ISL_6897977 | 10/11/21               |
| EPI_ISL_6897987 | 10/11/21               |
| EPI_ISL_6897993 | 10/12/21               |
| EPI_ISL_6898000 | 10/12/21               |
| EPI_ISL_6898002 | 10/12/21               |
| EPI_ISL_6898004 | 10/12/21               |
| EPI_ISL_6898012 | 10/12/21               |
| EPI_ISL_6898017 | 10/12/21               |
| EPI_ISL_6898031 | 10/13/21               |
| EPI_ISL_6898032 | 10/13/21               |
| EPI_ISL_6898040 | 10/13/21               |
| EPI_ISL_6898049 | 10/13/21               |
| EPI_ISL_6898052 | 10/13/21               |
| EPI_ISL_6898053 | 10/13/21               |
| EPI_ISL_6898066 | 10/13/21               |
| EPI_ISL_6898076 | 10/13/21               |
| EPI_ISL_6898077 | 10/14/21               |
| EPI_ISL_6898083 | 10/14/21               |
| EPI_ISL_6898091 | 10/14/21               |
| EPI_ISL_6898099 | 10/14/21               |
| EPI_ISL_6898100 | 10/14/21               |
| EPI_ISL_6898107 | 10/14/21               |

| Accession ID    | Sample Collection Date |
|-----------------|------------------------|
| EPI_ISL_6898111 | 10/14/21               |
| EPI_ISL_6898117 | 10/14/21               |
| EPI_ISL_6898123 | 10/14/21               |
| EPI_ISL_6898124 | 10/14/21               |
| EPI_ISL_6898128 | 10/14/21               |
| EPI_ISL_6898134 | 10/14/21               |
| EPI_ISL_6898138 | 10/14/21               |
| EPI_ISL_6898139 | 10/14/21               |
| EPI_ISL_6898146 | 10/14/21               |
| EPI_ISL_6898151 | 10/14/21               |
| EPI_ISL_6898158 | 10/14/21               |
| EPI_ISL_6898166 | 10/14/21               |
| EPI_ISL_6898167 | 10/14/21               |
| EPI_ISL_6898173 | 10/14/21               |
| EPI_ISL_6898179 | 10/14/21               |
| EPI_ISL_6898185 | 10/14/21               |
| EPI_ISL_6898186 | 10/14/21               |
| EPI_ISL_6898201 | 10/15/21               |
| EPI_ISL_6898209 | 10/15/21               |
| EPI_ISL_6898210 | 10/15/21               |
| EPI_ISL_6898219 | 10/15/21               |
| EPI_ISL_6898220 | 10/15/21               |
| EPI_ISL_6898223 | 10/15/21               |
| EPI_ISL_6898224 | 10/15/21               |
| EPI_ISL_6898230 | 10/15/21               |
| EPI_ISL_6898237 | 10/15/21               |
| EPI_ISL_6898243 | 10/15/21               |
| EPI_ISL_6898244 | 10/15/21               |
| EPI_ISL_6898249 | 10/15/21               |
| EPI_ISL_6898259 | 10/15/21               |
| EPI_ISL_6898260 | 10/16/21               |
| EPI_ISL_6898264 | 10/17/21               |
| EPI_ISL_6898273 | 10/17/21               |
| EPI_ISL_6898280 | 10/17/21               |
| EPI_ISL_6898286 | 10/17/21               |
| EPI_ISL_6898293 | 10/18/21               |
| EPI_ISL_6898294 | 10/18/21               |
| EPI_ISL_6898299 | 10/18/21               |
| EPI_ISL_6898301 | 10/18/21               |

| Accession ID    | Sample Collection Date |
|-----------------|------------------------|
| EPI_ISL_6898302 | 10/18/21               |
| EPI_ISL_6898304 | 10/18/21               |
| EPI_ISL_6898311 | 10/18/21               |
| EPI_ISL_6898315 | 10/18/21               |
| EPI_ISL_6898325 | 10/18/21               |
| EPI_ISL_6898326 | 10/18/21               |
| EPI_ISL_6898336 | 10/18/21               |
| EPI_ISL_6898341 | 10/19/21               |
| EPI_ISL_6898342 | 10/19/21               |
| EPI_ISL_6898947 | 10/14/21               |
| EPI_ISL_6898948 | 10/13/21               |
| EPI_ISL_6898950 | 10/11/21               |
| EPI_ISL_6898963 | 10/12/21               |
| EPI_ISL_6898964 | 10/15/21               |
| EPI_ISL_6898965 | 10/8/21                |
| EPI_ISL_6898970 | 10/8/21                |
| EPI_ISL_6898971 | 10/9/21                |
| EPI_ISL_6898976 | 10/13/21               |
| EPI_ISL_6898977 | 10/14/21               |
| EPI_ISL_6898978 | 10/15/21               |
| EPI_ISL_6898979 | 10/18/21               |
| EPI_ISL_6898991 | 10/15/21               |
| EPI_ISL_6899009 | 10/16/21               |
| EPI_ISL_6899017 | 10/15/21               |
| EPI_ISL_6899018 | 10/14/21               |
| EPI_ISL_6899025 | 10/13/21               |
| EPI_ISL_6899054 | 10/14/21               |
| EPI_ISL_6899062 | 10/14/21               |
| EPI_ISL_6899070 | 10/13/21               |
| EPI_ISL_6899071 | 10/15/21               |
| EPI_ISL_6899076 | 10/19/21               |
| EPI_ISL_6899086 | 10/15/21               |
| EPI_ISL_6897948 | 10/8/21                |
| EPI_ISL_6897981 | 10/11/21               |
| EPI_ISL_6898023 | 10/13/21               |
| EPI_ISL_6898060 | 10/13/21               |
| EPI_ISL_6898097 | 10/14/21               |
| EPI_ISL_525468  | 5/6/20                 |
| EPI_ISL_6898157 | 10/14/21               |

| Accession ID    | Sample Collection Date |
|-----------------|------------------------|
| EPI_ISL_6898192 | 10/15/21               |
| EPI_ISL_6898320 | 10/18/21               |
| EPI_ISL_6898353 | 10/20/21               |
| EPI_ISL_6898348 | 10/19/21               |
| EPI_ISL_6898949 | 10/11/21               |
| EPI_ISL_6898954 | 10/18/21               |
| EPI_ISL_6898990 | 10/14/21               |
| EPI_ISL_6899026 | 10/14/21               |
| EPI_ISL_6899089 | 10/18/21               |
| EPI_ISL_2501664 | 1/13/21                |
| EPI_ISL_2501665 | 1/15/21                |
| EPI_ISL_2501670 | 1/15/21                |
| EPI_ISL_2501671 | 1/13/21                |
| EPI_ISL_2501698 | 1/26/21                |
| EPI_ISL_2501700 | 1/15/21                |
| EPI_ISL_2501701 | 2/5/21                 |
| EPI_ISL_2501702 | 1/15/21                |
| EPI_ISL_2501707 | 1/14/21                |
| EPI_ISL_2501708 | 1/13/21                |
| EPI_ISL_2501709 | 2/9/21                 |
| EPI_ISL_2501710 | 1/15/21                |
| EPI_ISL_2501711 | 1/15/21                |
| EPI_ISL_2501712 | 1/15/21                |
| EPI_ISL_2501713 | 1/18/21                |
| EPI_ISL_2501714 | 1/26/21                |
| EPI_ISL_2501715 | 1/15/21                |
| EPI_ISL_2501716 | 1/15/21                |
| EPI_ISL_2501717 | 1/13/21                |
| EPI_ISL_2501720 | 2/5/21                 |
| EPI_ISL_2501723 | 2/5/21                 |
| EPI_ISL_2501728 | 1/14/21                |
| EPI_ISL_2501729 | 1/13/21                |
| EPI_ISL_2501730 | 1/13/21                |
| EPI_ISL_3827558 | 6/10/21                |
| EPI_ISL_2501718 | 2/3/21                 |
| EPI_ISL_906851  | 12/27/20               |
| EPI_ISL_2776156 | 3/19/21                |
| EPI_ISL_2776157 | 3/19/21                |
| EPI_ISL_2557422 | 3/1/21                 |

| Accession ID    | Sample Collection Date |
|-----------------|------------------------|
| EPI_ISL_2557423 | 3/27/21                |
| EPI_ISL_2557424 | 3/11/21                |
| EPI_ISL_6368762 | 5/21/21                |
| EPI_ISL_6368767 | 5/10/21                |
| EPI_ISL_6368777 | 5/10/21                |
| EPI_ISL_6368782 | 5/18/21                |
| EPI_ISL_6368785 | 5/10/21                |
| EPI_ISL_6368792 | 5/21/21                |
| EPI_ISL_6368797 | 5/10/21                |
| EPI_ISL_6368803 | 5/21/21                |
| EPI_ISL_6368807 | 5/21/21                |
| EPI_ISL_6368808 | 5/21/21                |
| EPI_ISL_6368809 | 5/10/21                |
| EPI_ISL_6368810 | 5/10/21                |
| EPI_ISL_6368812 | 5/20/21                |
| EPI_ISL_6368813 | 5/21/21                |
| EPI_ISL_6368814 | 5/20/21                |
| EPI_ISL_6368815 | 5/20/21                |
| EPI_ISL_6368816 | 5/10/21                |
| EPI_ISL_6368817 | 5/20/21                |
| EPI_ISL_6368818 | 5/17/21                |
| EPI_ISL_6368819 | 5/20/21                |
| EPI_ISL_6368820 | 5/15/21                |
| EPI_ISL_6368821 | 5/21/21                |
| EPI_ISL_6368822 | 5/20/21                |
| EPI_ISL_6368823 | 5/17/21                |
| EPI_ISL_6368824 | 5/18/21                |
| EPI_ISL_6368825 | 5/17/21                |
| EPI_ISL_6368826 | 5/10/21                |
| EPI_ISL_6368827 | 5/20/21                |
| EPI_ISL_6368828 | 5/17/21                |
| EPI_ISL_6368829 | 5/17/21                |
| EPI_ISL_6368830 | 5/21/21                |
| EPI_ISL_6368831 | 5/10/21                |
| EPI_ISL_6368832 | 5/10/21                |
| EPI_ISL_6368833 | 5/21/21                |
| EPI_ISL_6368834 | 5/21/21                |
| EPI_ISL_6368835 | 5/10/21                |
| EPI_ISL_6368836 | 5/10/21                |

| Accession ID    | Sample Collection Date |
|-----------------|------------------------|
| EPI_ISL_6368837 | 5/18/21                |
| EPI_ISL_6368838 | 5/21/21                |
| EPI_ISL_6368839 | 5/21/21                |
| EPI_ISL_6368840 | 5/21/21                |
| EPI_ISL_6368841 | 5/21/21                |
| EPI_ISL_6368842 | 5/21/21                |
| EPI_ISL_6368843 | 5/21/21                |
| EPI_ISL_6368844 | 5/10/21                |
| EPI_ISL_6368845 | 5/10/21                |
| EPI_ISL_6368846 | 5/17/21                |
| EPI_ISL_6368847 | 5/10/21                |
| EPI_ISL_6368848 | 5/13/21                |
| EPI_ISL_6368849 | 5/17/21                |
| EPI_ISL_6368850 | 5/10/21                |
| EPI_ISL_6368851 | 5/17/21                |
| EPI_ISL_6368852 | 5/10/21                |
| EPI_ISL_6368853 | 5/20/21                |
| EPI_ISL_6368854 | 5/17/21                |
| EPI_ISL_6368855 | 5/17/21                |
| EPI_ISL_6368856 | 5/17/21                |
| EPI_ISL_6368857 | 5/17/21                |
| EPI_ISL_6368858 | 5/21/21                |
| EPI_ISL_6368859 | 5/24/21                |
| EPI_ISL_6368860 | 5/21/21                |
| EPI_ISL_6368861 | 5/17/21                |
| EPI_ISL_6368862 | 5/10/21                |
| EPI_ISL_6368863 | 5/20/21                |
| EPI_ISL_6368864 | 5/21/21                |
| EPI_ISL_6368869 | 5/21/21                |
| EPI_ISL_6368870 | 5/17/21                |
| EPI_ISL_6368871 | 5/10/21                |
| EPI_ISL_6368872 | 5/20/21                |
| EPI_ISL_6368873 | 5/20/21                |
| EPI_ISL_2776158 | 3/24/21                |
| EPI_ISL_2776159 | 3/26/21                |
| EPI_ISL_2776161 | 3/5/21                 |
| EPI_ISL_2776164 | 3/30/21                |
| EPI_ISL_2776165 | 3/30/21                |
| EPI_ISL_2776166 | 3/30/21                |



| Accession ID    | Sample Collection Date |
|-----------------|------------------------|
| EPI_ISL_2776169 | 3/8/21                 |
| EPI_ISL_2776170 | 3/8/21                 |
| EPI_ISL_2776171 | 4/15/21                |
| EPI_ISL_2776172 | 4/15/21                |
| EPI_ISL_2776173 | 4/15/21                |
| EPI_ISL_2776174 | 4/13/21                |
| EPI_ISL_2776176 | 4/14/21                |
| EPI_ISL_2776177 | 4/23/21                |
| EPI_ISL_2776178 | 4/7/21                 |
| EPI_ISL_2776181 | 4/8/21                 |
| EPI_ISL_2776184 | 1/14/21                |
| EPI_ISL_2776185 | 1/14/21                |
| EPI_ISL_2776188 | 1/14/21                |
| EPI_ISL_2776193 | 1/26/21                |
| EPI_ISL_2776195 | 1/26/21                |
| EPI_ISL_2776196 | 1/26/21                |
| EPI_ISL_2776197 | 1/26/21                |
| EPI_ISL_2776198 | 1/26/21                |
| EPI_ISL_2776201 | 1/26/21                |
| EPI_ISL_2776202 | 1/26/21                |
| EPI_ISL_2776203 | 1/27/21                |
| EPI_ISL_2776206 | 4/14/21                |
| EPI_ISL_4220360 | 7/26/21                |
| EPI_ISL_2273999 | 3/1/21                 |
| EPI_ISL_2274001 | 3/4/21                 |
| EPI_ISL_2274002 | 3/10/21                |
| EPI_ISL_2274003 | 3/10/21                |
| EPI_ISL_2274005 | 3/13/21                |
| EPI_ISL_2274006 | 3/15/21                |
| EPI_ISL_2274007 | 3/15/21                |
| EPI_ISL_2274008 | 3/11/21                |
| EPI_ISL_2274009 | 3/12/21                |
| EPI_ISL_2274010 | 3/12/21                |
| EPI_ISL_2274011 | 3/9/21                 |
| EPI_ISL_2274012 | 3/15/21                |
| EPI_ISL_2274013 | 3/15/21                |
| EPI_ISL_2274014 | 3/16/21                |
| EPI_ISL_2274015 | 3/16/21                |
| EPI_ISL_2274016 | 3/15/21                |

| Accession ID    | Sample Collection Date |
|-----------------|------------------------|
| EPI_ISL_2274017 | 3/15/21                |
| EPI_ISL_2274018 | 3/17/21                |
| EPI_ISL_2274019 | 3/16/21                |
| EPI_ISL_2274020 | 3/17/21                |
| EPI_ISL_2274021 | 3/17/21                |
| EPI_ISL_2274022 | 3/17/21                |
| EPI_ISL_2274023 | 3/17/21                |
| EPI_ISL_2274024 | 3/17/21                |
| EPI_ISL_3104700 | 5/12/21                |
| EPI_ISL_3105426 | 1/26/21                |
| EPI_ISL_3105436 | 4/13/21                |
| EPI_ISL_3105537 | 1/22/21                |
| EPI_ISL_3827499 | 6/10/21                |
| EPI_ISL_3827767 | 6/10/21                |
| EPI_ISL_3828021 | 3/15/21                |
| EPI_ISL_4220348 | 7/22/21                |
| EPI_ISL_4220349 | 7/22/21                |
| EPI_ISL_4220351 | 8/14/21                |
| EPI_ISL_4220352 | 7/22/21                |
| EPI_ISL_4220353 | 7/21/21                |
| EPI_ISL_4220354 | 7/22/21                |
| EPI_ISL_4220355 | 8/4/21                 |
| EPI_ISL_4220356 | 7/26/21                |
| EPI_ISL_4220357 | 7/26/21                |
| EPI_ISL_4220358 | 7/26/21                |
| EPI_ISL_4220359 | 8/2/21                 |
| EPI_ISL_4220361 | 7/30/21                |
| EPI_ISL_4220362 | 7/29/21                |
| EPI_ISL_4220363 | 8/2/21                 |
| EPI_ISL_4220364 | 8/2/21                 |
| EPI_ISL_4220365 | 7/27/21                |
| EPI_ISL_4220366 | 7/26/21                |
| EPI_ISL_4220367 | 8/3/21                 |
| EPI_ISL_4220368 | 7/26/21                |
| EPI_ISL_4220369 | 8/2/21                 |
| EPI_ISL_4220370 | 8/3/21                 |
| EPI_ISL_4220371 | 7/26/21                |
| EPI_ISL_4220372 | 7/24/21                |
| EPI_ISL_4220373 | 7/27/21                |

| Accession ID    | Sample Collection Date |
|-----------------|------------------------|
| EPI_ISL_4220374 | 7/26/21                |
| EPI_ISL_4220375 | 7/26/21                |
| EPI_ISL_4220376 | 7/26/21                |
| EPI_ISL_4220377 | 7/23/21                |
| EPI_ISL_4220378 | 7/23/21                |
| EPI_ISL_4220379 | 8/2/21                 |
| EPI_ISL_4220380 | 7/26/21                |
| EPI_ISL_4220381 | 8/3/21                 |
| EPI_ISL_4220382 | 7/26/21                |
| EPI_ISL_4220383 | 7/27/21                |
| EPI_ISL_4220384 | 8/14/21                |
| EPI_ISL_2776194 | 1/26/21                |
| EPI_ISL_2776167 | 3/5/21                 |
| EPI_ISL_2776160 | 3/5/21                 |
| EPI_ISL_2776162 | 3/5/21                 |
| EPI_ISL_2776163 | 3/30/21                |
| EPI_ISL_2776168 | 3/5/21                 |
| EPI_ISL_2776175 | 4/14/21                |
| EPI_ISL_2776179 | 4/7/21                 |
| EPI_ISL_2776180 | 4/7/21                 |
| EPI_ISL_2776182 | 4/8/21                 |
| EPI_ISL_2776183 | 1/14/21                |
| EPI_ISL_2776186 | 1/14/21                |
| EPI_ISL_2776187 | 1/14/21                |
| EPI_ISL_2776189 | 1/14/21                |
| EPI_ISL_2776190 | 1/14/21                |
| EPI_ISL_2776191 | 1/14/21                |
| EPI_ISL_2776192 | 1/26/21                |
| EPI_ISL_2776199 | 1/26/21                |
| EPI_ISL_2776200 | 1/26/21                |
| EPI_ISL_2776204 | 1/27/21                |
| EPI_ISL_2776205 | 1/13/21                |
| EPI_ISL_4220350 | 7/26/21                |
| EPI_ISL_3045367 | 3/12/21                |
| EPI_ISL_3045368 | 3/15/21                |
| EPI_ISL_3045369 | 3/16/21                |
| EPI_ISL_3045385 | 5/21/21                |
| EPI_ISL_3045388 | 5/21/21                |
| EPI_ISL_3045389 | 5/18/21                |

| Accession ID    | Sample Collection Date |
|-----------------|------------------------|
| EPI_ISL_3045390 | 5/18/21                |
| EPI_ISL_3045391 | 5/21/21                |
| EPI_ISL_3045392 | 5/21/21                |
| EPI_ISL_3045395 | 5/21/21                |
| EPI_ISL_3045398 | 5/21/21                |
| EPI_ISL_3045401 | 5/20/21                |
| EPI_ISL_3045402 | 5/20/21                |
| EPI_ISL_3045405 | 5/21/21                |
| EPI_ISL_3045406 | 5/21/21                |
| EPI_ISL_3045407 | 5/21/21                |
| EPI_ISL_3045408 | 5/21/21                |
| EPI_ISL_3045409 | 5/21/21                |
| EPI_ISL_3045410 | 5/21/21                |
| EPI_ISL_3045411 | 5/21/21                |
| EPI_ISL_3045412 | 5/21/21                |
| EPI_ISL_3045413 | 5/21/21                |
| EPI_ISL_3045416 | 5/21/21                |
| EPI_ISL_3045417 | 5/21/21                |
| EPI_ISL_3045418 | 5/21/21                |
| EPI_ISL_3045419 | 5/20/21                |
| EPI_ISL_3045421 | 5/20/21                |
| EPI_ISL_3104659 | 5/10/21                |
| EPI_ISL_3104663 | 5/4/21                 |
| EPI_ISL_3104664 | 5/6/21                 |
| EPI_ISL_3104666 | 5/12/21                |
| EPI_ISL_3104668 | 5/10/21                |
| EPI_ISL_3104669 | 5/3/21                 |
| EPI_ISL_3104670 | 5/6/21                 |
| EPI_ISL_3104671 | 5/10/21                |
| EPI_ISL_3104672 | 5/12/21                |
| EPI_ISL_3104673 | 5/12/21                |
| EPI_ISL_3104674 | 5/12/21                |
| EPI_ISL_3104678 | 5/11/21                |
| EPI_ISL_3104680 | 5/12/21                |
| EPI_ISL_3104683 | 5/4/21                 |
| EPI_ISL_3104684 | 5/4/21                 |
| EPI_ISL_3104685 | 5/3/21                 |
| EPI_ISL_3104690 | 5/3/21                 |
| EPI_ISL_3104691 | 5/6/21                 |

| Accession ID    | Sample Collection Date |
|-----------------|------------------------|
| EPI_ISL_3104695 | 5/4/21                 |
| EPI_ISL_3104696 | 5/4/21                 |
| EPI_ISL_3104697 | 5/10/21                |
| EPI_ISL_3104698 | 5/10/21                |
| EPI_ISL_3104699 | 5/12/21                |
| EPI_ISL_3104701 | 5/12/21                |
| EPI_ISL_3104702 | 5/18/21                |
| EPI_ISL_3104706 | 5/10/21                |
| EPI_ISL_3104707 | 5/12/21                |
| EPI_ISL_3104708 | 5/12/21                |
| EPI_ISL_3104710 | 5/12/21                |
| EPI_ISL_3104717 | 5/11/21                |
| EPI_ISL_3104718 | 5/12/21                |
| EPI_ISL_3104719 | 5/6/21                 |
| EPI_ISL_3104722 | 5/7/21                 |
| EPI_ISL_3104723 | 5/11/21                |
| EPI_ISL_3104724 | 5/12/21                |
| EPI_ISL_3104753 | 5/3/21                 |
| EPI_ISL_3104754 | 5/4/21                 |
| EPI_ISL_3104755 | 5/4/21                 |
| EPI_ISL_3104756 | 5/4/21                 |
| EPI_ISL_3104757 | 5/4/21                 |
| EPI_ISL_3104758 | 5/6/21                 |
| EPI_ISL_3104759 | 5/6/21                 |
| EPI_ISL_3104760 | 5/6/21                 |
| EPI_ISL_3104761 | 5/11/21                |
| EPI_ISL_3104762 | 5/11/21                |
| EPI_ISL_3104763 | 5/12/21                |
| EPI_ISL_3104794 | 5/3/21                 |
| EPI_ISL_3104795 | 5/3/21                 |
| EPI_ISL_3105428 | 4/13/21                |
| EPI_ISL_3105435 | 2/9/21                 |
| EPI_ISL_3105438 | 1/27/21                |
| EPI_ISL_3105439 | 1/14/21                |
| EPI_ISL_3105444 | 1/26/21                |
| EPI_ISL_3105450 | 3/24/21                |
| EPI_ISL_3105467 | 1/26/21                |
| EPI_ISL_3105468 | 3/26/21                |
| EPI_ISL_3105488 | 3/30/21                |

| Accession ID    | Sample Collection Date |
|-----------------|------------------------|
| EPI_ISL_3105491 | 1/12/21                |
| EPI_ISL_3105501 | 4/15/21                |
| EPI_ISL_3105502 | 4/13/21                |
| EPI_ISL_3105503 | 4/13/21                |
| EPI_ISL_3105535 | 3/24/21                |
| EPI_ISL_3105536 | 1/15/21                |
| EPI_ISL_3105538 | 1/13/21                |
| EPI_ISL_3105539 | 3/24/21                |
| EPI_ISL_3105544 | 1/26/21                |
| EPI_ISL_6437538 | 3/17/21                |
| EPI_ISL_6437539 | 3/12/21                |
| EPI_ISL_6437540 | 3/16/21                |
| EPI_ISL_6437541 | 3/17/21                |
| EPI_ISL_6437542 | 3/16/21                |
| EPI_ISL_6437543 | 3/12/21                |
| EPI_ISL_6437544 | 3/16/21                |
| EPI_ISL_6437545 | 3/16/21                |
| EPI_ISL_6437546 | 3/5/21                 |
| EPI_ISL_6437547 | 3/8/21                 |
| EPI_ISL_6437548 | 3/8/21                 |
| EPI_ISL_6437549 | 3/5/21                 |
| EPI_ISL_6437550 | 3/16/21                |
| EPI_ISL_6437551 | 3/15/21                |
| EPI_ISL_6437552 | 3/17/21                |
| EPI_ISL_6437553 | 3/3/21                 |
| EPI_ISL_6437554 | 3/14/21                |
| EPI_ISL_6437555 | 3/17/21                |
| EPI_ISL_3188565 | 5/12/21                |
| EPI_ISL_3188570 | 5/12/21                |
| EPI_ISL_3188571 | 5/12/21                |
| EPI_ISL_3188572 | 5/10/21                |
| EPI_ISL_3188598 | 5/4/21                 |
| EPI_ISL_3188599 | 5/6/21                 |
| EPI_ISL_3188600 | 5/6/21                 |
| EPI_ISL_3188603 | 5/10/21                |
| EPI_ISL_3188604 | 5/10/21                |
| EPI_ISL_3188605 | 5/11/21                |
| EPI_ISL_3188606 | 5/12/21                |
| EPI_ISL_3188607 | 5/12/21                |

| Accession ID    | Sample Collection Date |
|-----------------|------------------------|
| EPI_ISL_3188617 | 5/10/21                |
| EPI_ISL_3236433 | 5/18/21                |
| EPI_ISL_3236434 | 5/18/21                |
| EPI_ISL_3236435 | 5/18/21                |
| EPI_ISL_3236436 | 5/18/21                |
| EPI_ISL_3236437 | 5/18/21                |
| EPI_ISL_3236438 | 5/18/21                |
| EPI_ISL_3236439 | 5/18/21                |
| EPI_ISL_3236440 | 5/31/21                |
| EPI_ISL_3236441 | 5/31/21                |
| EPI_ISL_3236442 | 5/31/21                |
| EPI_ISL_3236443 | 5/31/21                |
| EPI_ISL_3236444 | 5/31/21                |
| EPI_ISL_3236445 | 6/1/21                 |
| EPI_ISL_3236446 | 6/2/21                 |
| EPI_ISL_3236447 | 6/10/21                |
| EPI_ISL_3236448 | 6/14/21                |
| EPI_ISL_3236449 | 6/29/21                |
| EPI_ISL_3236450 | 6/29/21                |
| EPI_ISL_3236451 | 6/29/21                |
| EPI_ISL_3236452 | 6/11/21                |
| EPI_ISL_8482323 | 10/8/21                |
| EPI_ISL_8482325 | 10/8/21                |
| EPI_ISL_8482334 | 10/11/21               |
| EPI_ISL_8482324 | 10/8/21                |
| EPI_ISL_8482326 | 10/9/21                |
| EPI_ISL_8482316 | 10/7/21                |
| EPI_ISL_8482327 | 10/9/21                |
| EPI_ISL_8482330 | 10/11/21               |
| EPI_ISL_8482317 | 10/8/21                |
| EPI_ISL_8482328 | 10/9/21                |
| EPI_ISL_8482318 | 10/8/21                |
| EPI_ISL_8482329 | 10/10/21               |
| EPI_ISL_8482319 | 10/8/21                |
| EPI_ISL_8482320 | 10/8/21                |
| EPI_ISL_8482331 | 10/11/21               |
| EPI_ISL_8482321 | 10/8/21                |
| EPI_ISL_8482332 | 10/11/21               |
| EPI_ISL_8482322 | 10/8/21                |

| Accession ID    | Sample Collection Date |
|-----------------|------------------------|
| EPI_ISL_8482333 | 10/11/21               |
| EPI_ISL_8482346 | 10/12/21               |
| EPI_ISL_8482345 | 10/12/21               |
| EPI_ISL_8482335 | 10/11/21               |
| EPI_ISL_8482336 | 10/11/21               |
| EPI_ISL_8482347 | 10/12/21               |
| EPI_ISL_8482337 | 10/11/21               |
| EPI_ISL_8482349 | 10/12/21               |
| EPI_ISL_8482348 | 10/12/21               |
| EPI_ISL_8482338 | 10/11/21               |
| EPI_ISL_8482339 | 10/11/21               |
| EPI_ISL_8482341 | 10/12/21               |
| EPI_ISL_8482350 | 10/12/21               |
| EPI_ISL_8482340 | 10/11/21               |
| EPI_ISL_8482351 | 10/13/21               |
| EPI_ISL_8482342 | 10/12/21               |
| EPI_ISL_8482343 | 10/12/21               |
| EPI_ISL_8482344 | 10/12/21               |
| EPI_ISL_8482356 | 10/13/21               |
| EPI_ISL_8482357 | 10/13/21               |
| EPI_ISL_8482358 | 10/14/21               |
| EPI_ISL_8482360 | 10/14/21               |
| EPI_ISL_8482359 | 10/14/21               |
| EPI_ISL_8482361 | 10/14/21               |
| EPI_ISL_8482362 | 10/14/21               |
| EPI_ISL_8482352 | 10/13/21               |
| EPI_ISL_8482353 | 10/13/21               |
| EPI_ISL_8482354 | 10/13/21               |
| EPI_ISL_8482355 | 10/13/21               |
| EPI_ISL_8482370 | 10/14/21               |
| EPI_ISL_8482367 | 10/14/21               |
| EPI_ISL_8482378 | 10/15/21               |
| EPI_ISL_8482363 | 10/14/21               |
| EPI_ISL_8482374 | 10/14/21               |
| EPI_ISL_8482368 | 10/14/21               |
| EPI_ISL_8482369 | 10/14/21               |
| EPI_ISL_8482371 | 10/14/21               |
| EPI_ISL_8482372 | 10/14/21               |
| EPI_ISL_8482373 | 10/14/21               |



| Accession ID    | Sample Collection Date |
|-----------------|------------------------|
| EPI_ISL_8482375 | 10/15/21               |
| EPI_ISL_8482365 | 10/14/21               |
| EPI_ISL_8482376 | 10/15/21               |
| EPI_ISL_8482366 | 10/14/21               |
| EPI_ISL_8482377 | 10/15/21               |
| EPI_ISL_8482389 | 10/15/21               |
| EPI_ISL_8482388 | 10/15/21               |
| EPI_ISL_8482379 | 10/15/21               |
| EPI_ISL_8482393 | 10/15/21               |
| EPI_ISL_8482381 | 10/15/21               |
| EPI_ISL_8482392 | 10/15/21               |
| EPI_ISL_8482382 | 10/15/21               |
| EPI_ISL_8482383 | 10/15/21               |
| EPI_ISL_8482394 | 10/15/21               |
| EPI_ISL_8482384 | 10/15/21               |
| EPI_ISL_8482385 | 10/15/21               |
| EPI_ISL_8482386 | 10/15/21               |
| EPI_ISL_8482387 | 10/15/21               |
| EPI_ISL_8482390 | 10/15/21               |
| EPI_ISL_8482380 | 10/15/21               |
| EPI_ISL_8482391 | 10/15/21               |
| EPI_ISL_8482395 | 10/15/21               |
| EPI_ISL_8482396 | 10/15/21               |
| EPI_ISL_8482397 | 10/15/21               |
| EPI_ISL_8482398 | 10/15/21               |
| EPI_ISL_8482399 | 10/17/21               |
| EPI_ISL_8482364 | 10/14/21               |
| EPI_ISL_8482796 | 10/18/21               |
| EPI_ISL_8482797 | 10/18/21               |
| EPI_ISL_8482787 | 10/15/21               |
| EPI_ISL_8482790 | 10/15/21               |
| EPI_ISL_8482798 | 10/18/21               |
| EPI_ISL_8482786 | 10/15/21               |
| EPI_ISL_8482799 | 10/18/21               |
| EPI_ISL_8482785 | 10/15/21               |
| EPI_ISL_8482788 | 10/15/21               |
| EPI_ISL_8482789 | 10/15/21               |
| EPI_ISL_8482791 | 10/15/21               |
| EPI_ISL_8482792 | 10/16/21               |

| Accession ID    | Sample Collection Date |
|-----------------|------------------------|
| EPI_ISL_8482793 | 10/16/21               |
| EPI_ISL_8482794 | 10/17/21               |
| EPI_ISL_8482795 | 10/17/21               |
| EPI_ISL_8482780 | 10/13/21               |
| EPI_ISL_8482781 | 10/13/21               |
| EPI_ISL_8482782 | 10/13/21               |
| EPI_ISL_8482783 | 10/14/21               |
| EPI_ISL_8482784 | 10/14/21               |
| EPI_ISL_8482837 | 10/20/21               |
| EPI_ISL_8482834 | 10/19/21               |
| EPI_ISL_8482830 | 10/19/21               |
| EPI_ISL_8482831 | 10/19/21               |
| EPI_ISL_8482832 | 10/19/21               |
| EPI_ISL_8482833 | 10/19/21               |
| EPI_ISL_8482835 | 10/19/21               |
| EPI_ISL_8482836 | 10/20/21               |
| EPI_ISL_8482826 | 10/19/21               |
| EPI_ISL_8482827 | 10/19/21               |
| EPI_ISL_8482828 | 10/19/21               |
| EPI_ISL_8482829 | 10/19/21               |
| EPI_ISL_8482820 | 10/18/21               |
| EPI_ISL_8482821 | 10/18/21               |
| EPI_ISL_8482823 | 10/18/21               |
| EPI_ISL_8482822 | 10/18/21               |
| EPI_ISL_8482824 | 10/18/21               |
| EPI_ISL_8482825 | 10/18/21               |
| EPI_ISL_8482815 | 10/18/21               |
| EPI_ISL_8482816 | 10/18/21               |
| EPI_ISL_8482817 | 10/18/21               |
| EPI_ISL_8482818 | 10/18/21               |
| EPI_ISL_8482819 | 10/18/21               |
| EPI_ISL_8482810 | 10/18/21               |
| EPI_ISL_8482811 | 10/18/21               |
| EPI_ISL_8482813 | 10/18/21               |
| EPI_ISL_8482812 | 10/18/21               |
| EPI_ISL_8482814 | 10/18/21               |
| EPI_ISL_8482804 | 10/18/21               |
| EPI_ISL_8482805 | 10/18/21               |
| EPI_ISL_8482806 | 10/18/21               |

| Accession ID    | Sample Collection Date |
|-----------------|------------------------|
| EPI_ISL_8482803 | 10/18/21               |
| EPI_ISL_8482808 | 10/18/21               |
| EPI_ISL_8482807 | 10/18/21               |
| EPI_ISL_8482809 | 10/18/21               |
| EPI_ISL_8482800 | 10/18/21               |
| EPI_ISL_8482801 | 10/18/21               |
| EPI_ISL_8482802 | 10/18/21               |
| EPI_ISL_5587613 | 6/18/21                |
| EPI_ISL_5587621 | 6/21/21                |
| EPI_ISL_5587633 | 6/21/21                |
| EPI_ISL_5587645 | 6/22/21                |
| EPI_ISL_5587651 | 6/22/21                |
| EPI_ISL_5587660 | 6/22/21                |
| EPI_ISL_5587664 | 6/22/21                |
| EPI_ISL_5587676 | 9/20/21                |
| EPI_ISL_5587688 | 9/8/21                 |
| EPI_ISL_5587695 | 9/8/21                 |
| EPI_ISL_5587703 | 8/24/21                |
| EPI_ISL_5621195 | 6/27/21                |
| EPI_ISL_5621494 | 6/28/21                |
| EPI_ISL_5621499 | 6/30/21                |
| EPI_ISL_5621502 | 7/1/21                 |
| EPI_ISL_9405828 | 11/8/21                |
| EPI_ISL_9405831 | 11/10/21               |
| EPI_ISL_9405836 | 11/11/21               |
| EPI_ISL_9405837 | 11/12/21               |
| EPI_ISL_9405838 | 11/12/21               |
| EPI_ISL_9405839 | 11/11/21               |
| EPI_ISL_9405842 | 11/8/21                |
| EPI_ISL_9405864 | 11/18/21               |
| EPI_ISL_9405845 | 11/12/21               |
| EPI_ISL_9405848 | 11/15/21               |
| EPI_ISL_9405846 | 11/15/21               |
| EPI_ISL_9405847 | 11/15/21               |
| EPI_ISL_9405849 | 11/15/21               |
| EPI_ISL_9405857 | 11/17/21               |
| EPI_ISL_9405851 | 11/15/21               |
| EPI_ISL_9405856 | 11/15/21               |
| EPI_ISL_9405852 | 11/16/21               |

| Accession ID    | Sample Collection Date |
|-----------------|------------------------|
| EPI_ISL_9405853 | 11/16/21               |
| EPI_ISL_9405855 | 11/16/21               |
| EPI_ISL_9405858 | 11/17/21               |
| EPI_ISL_9405860 | 11/16/21               |
| EPI_ISL_9405865 | 11/18/21               |
| EPI_ISL_9405874 | 11/22/21               |
| EPI_ISL_9405869 | 11/22/21               |
| EPI_ISL_9405879 | 11/22/21               |
| EPI_ISL_9405873 | 11/22/21               |
| EPI_ISL_9405885 | 11/23/21               |
| EPI_ISL_9405878 | 11/22/21               |
| EPI_ISL_9405884 | 11/23/21               |
| EPI_ISL_9405889 | 11/23/21               |
| EPI_ISL_9405887 | 11/22/21               |
| EPI_ISL_9405888 | 11/22/21               |
| EPI_ISL_9405890 | 11/23/21               |
| EPI_ISL_9405894 | 11/23/21               |
| EPI_ISL_9405899 | 11/24/21               |
| EPI_ISL_9405904 | 11/24/21               |
| EPI_ISL_9405902 | 11/24/21               |
| EPI_ISL_9405905 | 11/25/21               |
| EPI_ISL_9405898 | 11/23/21               |
| EPI_ISL_9405897 | 11/22/21               |
| EPI_ISL_9405896 | 11/24/21               |
| EPI_ISL_9405903 | 11/24/21               |
| EPI_ISL_9405901 | 11/25/21               |
| EPI_ISL_9405900 | 11/23/21               |
| EPI_ISL_9405908 | 12/2/21                |
| EPI_ISL_9405907 | 11/18/21               |
| EPI_ISL_9405906 | 11/26/21               |
| EPI_ISL_9413625 | 10/28/21               |
| EPI_ISL_9413639 | 10/26/21               |
| EPI_ISL_9413645 | 2/11/21                |
| EPI_ISL_9413657 | 5/11/21                |
| EPI_ISL_9413659 | 10/29/21               |
| EPI_ISL_9413669 | 1/11/21                |
| EPI_ISL_9413671 | 10/28/21               |
| EPI_ISL_9413623 | 3/11/21                |
| EPI_ISL_9413648 | 2/11/21                |

| Accession ID    | Sample Collection Date |
|-----------------|------------------------|
| EPI_ISL_9413641 | 1/11/21                |
| EPI_ISL_9413643 | 1/11/21                |
| EPI_ISL_9413634 | 1/11/21                |
| EPI_ISL_9413627 | 10/30/21               |
| EPI_ISL_9413628 | 10/31/21               |
| EPI_ISL_9413631 | 10/29/21               |
| EPI_ISL_9413621 | 3/11/21                |
| EPI_ISL_9413613 | 1/11/21                |
| EPI_ISL_9413609 | 10/27/21               |
| EPI_ISL_9413612 | 10/31/21               |
| EPI_ISL_9413670 | 10/28/21               |
| EPI_ISL_9413660 | 2/11/21                |
| EPI_ISL_9413662 | 10/30/21               |
| EPI_ISL_9413654 | 3/11/21                |
| EPI_ISL_9413652 | 3/11/21                |
| EPI_ISL_5687427 | 8/23/21                |
| EPI_ISL_5687696 | 7/2/21                 |
| EPI_ISL_5687945 | 7/4/21                 |
| EPI_ISL_5688222 | 7/5/21                 |
| EPI_ISL_5689590 | 6/7/21                 |
| EPI_ISL_5689672 | 6/7/21                 |
| EPI_ISL_5689763 | 7/12/21                |
| EPI_ISL_5689766 | 7/13/21                |
| EPI_ISL_5689767 | 7/27/21                |
| EPI_ISL_5689768 | 7/30/21                |
| EPI_ISL_5689772 | 8/16/21                |
| EPI_ISL_5689774 | 8/18/21                |
| EPI_ISL_9413642 | 3/11/21                |
| EPI_ISL_9413638 | 1/11/21                |
| EPI_ISL_9413647 | 1/11/21                |
| EPI_ISL_9413644 | 10/28/21               |
| EPI_ISL_9413646 | 4/11/21                |
| EPI_ISL_9413640 | 10/25/21               |
| EPI_ISL_9413629 | 10/29/21               |
| EPI_ISL_9413618 | 2/11/21                |
| EPI_ISL_9413635 | 10/29/21               |
| EPI_ISL_9413630 | 10/31/21               |
| EPI_ISL_9413636 | 2/11/21                |
| EPI_ISL_9413637 | 1/11/21                |

| Accession ID    | Sample Collection Date |
|-----------------|------------------------|
| EPI_ISL_9413633 | 1/11/21                |
| EPI_ISL_9413616 | 10/29/21               |
| EPI_ISL_9413632 | 10/26/21               |
| EPI_ISL_9413617 | 2/11/21                |
| EPI_ISL_9413619 | 10/29/21               |
| EPI_ISL_9413624 | 10/31/21               |
| EPI_ISL_9413626 | 10/29/21               |
| EPI_ISL_9413620 | 3/11/21                |
| EPI_ISL_9413622 | 4/11/21                |
| EPI_ISL_9413615 | 2/11/21                |
| EPI_ISL_9413614 | 2/11/21                |
| EPI_ISL_9413610 | 10/27/21               |
| EPI_ISL_9413611 | 10/29/21               |
| EPI_ISL_9413663 | 4/11/21                |
| EPI_ISL_9413668 | 10/27/21               |
| EPI_ISL_9413672 | 10/26/21               |
| EPI_ISL_9413665 | 5/11/21                |
| EPI_ISL_9413667 | 3/11/21                |
| EPI_ISL_9413664 | 10/27/21               |
| EPI_ISL_9413666 | 1/11/21                |
| EPI_ISL_9413661 | 4/11/21                |
| EPI_ISL_9413653 | 2/11/21                |
| EPI_ISL_9413649 | 3/11/21                |
| EPI_ISL_9413656 | 5/11/21                |
| EPI_ISL_9413658 | 3/11/21                |
| EPI_ISL_9413655 | 5/11/21                |
| EPI_ISL_9413650 | 3/11/21                |
| EPI_ISL_9413651 | 1/11/21                |
| EPI_ISL_3188569 | 5/12/21                |
| EPI_ISL_3188597 | 5/3/21                 |
| EPI_ISL_3188601 | 5/10/21                |
| EPI_ISL_3188602 | 5/10/21                |
| EPI_ISL_3188608 | 5/12/21                |
| EPI_ISL_3188609 | 5/18/21                |
| EPI_ISL_3188610 | 5/18/21                |
| EPI_ISL_3188611 | 5/18/21                |
| EPI_ISL_9405895 | 11/23/21               |
| EPI_ISL_9405893 | 11/23/21               |
| EPI_ISL_9405892 | 11/23/21               |

| Accession ID    | Sample Collection Date |
|-----------------|------------------------|
| EPI_ISL_9405891 | 11/24/21               |
| EPI_ISL_9405877 | 11/22/21               |
| EPI_ISL_9405876 | 11/23/21               |
| EPI_ISL_9405882 | 11/23/21               |
| EPI_ISL_9405872 | 11/22/21               |
| EPI_ISL_9405871 | 11/22/21               |
| EPI_ISL_9405870 | 11/22/21               |
| EPI_ISL_9405886 | 11/23/21               |
| EPI_ISL_9405883 | 11/23/21               |
| EPI_ISL_9405881 | 11/23/21               |
| EPI_ISL_9405880 | 11/22/21               |
| EPI_ISL_9405867 | 11/22/21               |
| EPI_ISL_9405862 | 11/17/21               |
| EPI_ISL_9405863 | 11/18/21               |
| EPI_ISL_9405859 | 11/16/21               |
| EPI_ISL_9405854 | 11/15/21               |
| EPI_ISL_9405850 | 11/15/21               |
| EPI_ISL_9405868 | 11/22/21               |
| EPI_ISL_9405866 | 11/18/21               |
| EPI_ISL_9405861 | 11/15/21               |
| EPI_ISL_9405835 | 11/10/21               |
| EPI_ISL_9405834 | 11/10/21               |
| EPI_ISL_9405833 | 11/12/21               |
| EPI_ISL_9405832 | 11/11/21               |
| EPI_ISL_9405830 | 11/12/21               |
| EPI_ISL_9405829 | 11/3/21                |
| EPI_ISL_9405844 | 11/15/21               |
| EPI_ISL_9405843 | 11/12/21               |
| EPI_ISL_9405841 | 11/11/21               |
| EPI_ISL_9405840 | 11/12/21               |
| EPI_ISL_3045384 | 5/21/21                |
| EPI_ISL_3045386 | 5/21/21                |
| EPI_ISL_3045387 | 5/21/21                |
| EPI_ISL_3045393 | 5/21/21                |
| EPI_ISL_3045394 | 5/21/21                |
| EPI_ISL_3045396 | 5/18/21                |
| EPI_ISL_3045397 | 5/21/21                |
| EPI_ISL_3045399 | 5/20/21                |
| EPI_ISL_3045400 | 5/20/21                |

| Accession ID    | Sample Collection Date |
|-----------------|------------------------|
| EPI_ISL_3045403 | 5/21/21                |
| EPI_ISL_3045404 | 5/21/21                |
| EPI_ISL_3045414 | 5/21/21                |
| EPI_ISL_3045415 | 5/21/21                |
| EPI_ISL_3045420 | 5/20/21                |
| EPI_ISL_3045422 | 5/24/21                |
| EPI_ISL_5587623 | 6/21/21                |
| EPI_ISL_3190269 | 5/21/21                |
| EPI_ISL_3190270 | 5/31/21                |
| EPI_ISL_2274000 | 3/27/21                |
| EPI_ISL_2274004 | 3/11/21                |
| EPI_ISL_2274025 | 3/18/21                |
| EPI_ISL_2274026 | 3/18/21                |
| EPI_ISL_1378834 | 3/11/21                |
| EPI_ISL_1378835 | 3/11/21                |
| EPI_ISL_1378836 | 3/11/21                |
| EPI_ISL_1378837 | 3/11/21                |
| EPI_ISL_1378838 | 3/11/21                |
| EPI_ISL_1378839 | 3/11/21                |
| EPI_ISL_1378840 | 3/8/21                 |
| EPI_ISL_1378841 | 3/11/21                |
| EPI_ISL_1378842 | 3/12/21                |
| EPI_ISL_1378844 | 11/18/20               |
| EPI_ISL_5620856 | 6/23/21                |
| EPI_ISL_2601034 | 6/10/21                |
| EPI_ISL_5587680 | 9/16/21                |
| EPI_ISL_5621287 | 6/28/21                |
| EPI_ISL_5587611 | 6/18/21                |
| EPI_ISL_5587617 | 6/18/21                |
| EPI_ISL_2601037 | 6/10/21                |
| EPI_ISL_2601038 | 6/10/21                |
| EPI_ISL_2601035 | 6/10/21                |
| EPI_ISL_8642669 | 12/7/21                |
| EPI_ISL_8642603 | 12/2/21                |
| EPI_ISL_8642634 | 12/4/21                |
| EPI_ISL_8642625 | 12/3/21                |
| EPI_ISL_8642630 | 12/3/21                |
| EPI_ISL_8642627 | 12/3/21                |
| EPI_ISL_8642632 | 12/3/21                |



| Accession ID    | Sample Collection Date |
|-----------------|------------------------|
| EPI_ISL_8642631 | 12/3/21                |
| EPI_ISL_8642636 | 12/6/21                |
| EPI_ISL_8642658 | 12/7/21                |
| EPI_ISL_8642657 | 12/7/21                |
| EPI_ISL_8642702 | 12/9/21                |
| EPI_ISL_8642709 | 12/10/21               |
| EPI_ISL_8642707 | 12/10/21               |
| EPI_ISL_8642706 | 12/10/21               |
| EPI_ISL_8642711 | 12/10/21               |
| EPI_ISL_8642579 | 11/29/21               |
| EPI_ISL_8642580 | 11/29/21               |
| EPI_ISL_8642600 | 12/2/21                |
| EPI_ISL_8642624 | 12/3/21                |
| EPI_ISL_8642611 | 12/2/21                |
| EPI_ISL_8642621 | 12/2/21                |
| EPI_ISL_8642622 | 12/3/21                |
| EPI_ISL_8642587 | 12/1/21                |
| EPI_ISL_8642576 | 11/29/21               |
| EPI_ISL_8642577 | 11/29/21               |
| EPI_ISL_8642574 | 11/25/21               |
| EPI_ISL_8642575 | 11/29/21               |
| EPI_ISL_8642572 | 11/19/21               |
| EPI_ISL_8642578 | 11/29/21               |
| EPI_ISL_8642573 | 11/22/21               |
| EPI_ISL_8642571 | 11/17/21               |
| EPI_ISL_8642586 | 11/30/21               |
| EPI_ISL_8642598 | 12/2/21                |
| EPI_ISL_8642588 | 12/1/21                |
| EPI_ISL_8642589 | 12/1/21                |
| EPI_ISL_8642583 | 11/30/21               |
| EPI_ISL_8642582 | 11/30/21               |
| EPI_ISL_8642585 | 11/30/21               |
| EPI_ISL_8642596 | 12/1/21                |
| EPI_ISL_8642591 | 12/1/21                |
| EPI_ISL_8642594 | 12/1/21                |
| EPI_ISL_8642584 | 11/30/21               |
| EPI_ISL_8642581 | 11/30/21               |
| EPI_ISL_8642595 | 12/1/21                |
| EPI_ISL_8642612 | 12/2/21                |

| Accession ID    | Sample Collection Date |
|-----------------|------------------------|
| EPI_ISL_8642599 | 12/2/21                |
| EPI_ISL_8642597 | 12/2/21                |
| EPI_ISL_8642590 | 12/1/21                |
| EPI_ISL_8642593 | 12/1/21                |
| EPI_ISL_8642615 | 12/2/21                |
| EPI_ISL_8642592 | 12/1/21                |
| EPI_ISL_8642601 | 12/2/21                |
| EPI_ISL_8642610 | 12/2/21                |
| EPI_ISL_8642614 | 12/2/21                |
| EPI_ISL_8642602 | 12/2/21                |
| EPI_ISL_8642613 | 12/2/21                |
| EPI_ISL_8642606 | 12/2/21                |
| EPI_ISL_8642604 | 12/2/21                |
| EPI_ISL_8642607 | 12/2/21                |
| EPI_ISL_8642609 | 12/2/21                |
| EPI_ISL_8642617 | 12/2/21                |
| EPI_ISL_8642616 | 12/2/21                |
| EPI_ISL_8642605 | 12/2/21                |
| EPI_ISL_8642608 | 12/2/21                |
| EPI_ISL_8642620 | 12/2/21                |
| EPI_ISL_8642618 | 12/2/21                |
| EPI_ISL_8642619 | 12/2/21                |
| EPI_ISL_8642655 | 12/6/21                |
| EPI_ISL_8642662 | 12/7/21                |
| EPI_ISL_8642678 | 12/8/21                |
| EPI_ISL_8642704 | 12/9/21                |
| EPI_ISL_8642633 | 12/3/21                |
| EPI_ISL_8642628 | 12/3/21                |
| EPI_ISL_8642640 | 12/6/21                |
| EPI_ISL_8642644 | 12/6/21                |
| EPI_ISL_8642643 | 12/6/21                |
| EPI_ISL_8642642 | 12/6/21                |
| EPI_ISL_8642641 | 12/6/21                |
| EPI_ISL_8642647 | 12/6/21                |
| EPI_ISL_8642639 | 12/6/21                |
| EPI_ISL_8642646 | 12/6/21                |
| EPI_ISL_8642645 | 12/6/21                |
| EPI_ISL_8642638 | 12/6/21                |
| EPI_ISL_8642649 | 12/6/21                |

| Accession ID    | Sample Collection Date |
|-----------------|------------------------|
| EPI_ISL_8642637 | 12/6/21                |
| EPI_ISL_8642653 | 12/6/21                |
| EPI_ISL_8642654 | 12/6/21                |
| EPI_ISL_8642656 | 12/6/21                |
| EPI_ISL_8642664 | 12/7/21                |
| EPI_ISL_8642666 | 12/7/21                |
| EPI_ISL_8642651 | 12/6/21                |
| EPI_ISL_8642652 | 12/6/21                |
| EPI_ISL_8642650 | 12/6/21                |
| EPI_ISL_8642648 | 12/6/21                |
| EPI_ISL_8642665 | 12/7/21                |
| EPI_ISL_8642663 | 12/7/21                |
| EPI_ISL_8642673 | 12/7/21                |
| EPI_ISL_8642674 | 12/7/21                |
| EPI_ISL_8642668 | 12/7/21                |
| EPI_ISL_8642675 | 12/7/21                |
| EPI_ISL_8642676 | 12/8/21                |
| EPI_ISL_8642679 | 12/8/21                |
| EPI_ISL_8642667 | 12/7/21                |
| EPI_ISL_8642660 | 12/7/21                |
| EPI_ISL_8642661 | 12/7/21                |
| EPI_ISL_8642659 | 12/7/21                |
| EPI_ISL_8642677 | 12/8/21                |
| EPI_ISL_8642672 | 12/7/21                |
| EPI_ISL_8642683 | 12/8/21                |
| EPI_ISL_8642690 | 12/8/21                |
| EPI_ISL_8642671 | 12/7/21                |
| EPI_ISL_8642687 | 12/8/21                |
| EPI_ISL_8642685 | 12/8/21                |
| EPI_ISL_8642700 | 12/9/21                |
| EPI_ISL_8642670 | 12/7/21                |
| EPI_ISL_8642684 | 12/8/21                |
| EPI_ISL_8642697 | 12/8/21                |
| EPI_ISL_8642686 | 12/8/21                |
| EPI_ISL_8642688 | 12/8/21                |
| EPI_ISL_8642689 | 12/8/21                |
| EPI_ISL_8642682 | 12/8/21                |
| EPI_ISL_8642680 | 12/8/21                |
| EPI_ISL_8642681 | 12/8/21                |

| Accession ID    | Sample Collection Date |
|-----------------|------------------------|
| EPI_ISL_8642698 | 12/9/21                |
| EPI_ISL_8642695 | 12/8/21                |
| EPI_ISL_8642699 | 12/9/21                |
| EPI_ISL_8642693 | 12/8/21                |
| EPI_ISL_8642694 | 12/8/21                |
| EPI_ISL_8642696 | 12/8/21                |
| EPI_ISL_8642701 | 12/9/21                |
| EPI_ISL_8642712 | 12/10/21               |
| EPI_ISL_8642691 | 12/8/21                |
| EPI_ISL_8642705 | 12/9/21                |
| EPI_ISL_8642714 | 12/13/21               |
| EPI_ISL_8642626 | 12/3/21                |
| EPI_ISL_8642716 | 12/13/21               |
| EPI_ISL_8642713 | 12/13/21               |
| EPI_ISL_8642703 | 12/9/21                |
| EPI_ISL_8642708 | 12/10/21               |
| EPI_ISL_8642635 | 12/6/21                |
| EPI_ISL_8642710 | 12/10/21               |
| EPI_ISL_8642715 | 12/13/21               |
| EPI_ISL_8642623 | 12/3/21                |
| EPI_ISL_8642629 | 12/3/21                |
| EPI_ISL_1378833 | 2/12/21                |
| EPI_ISL_9591620 | 9/8/21                 |
| EPI_ISL_9591264 | 8/31/21                |
| EPI_ISL_9631583 | 8/8/20                 |
| EPI_ISL_9631585 | 8/8/20                 |
| EPI_ISL_9631714 | 9/17/20                |
| EPI_ISL_9631639 | 9/14/20                |
| EPI_ISL_9631619 | 10/9/20                |
| EPI_ISL_9631584 | 8/8/20                 |
| EPI_ISL_9631610 | 10/9/20                |
| EPI_ISL_9631644 | 9/14/20                |
| EPI_ISL_9631621 | 10/9/20                |
| EPI_ISL_9631645 | 9/15/20                |
| EPI_ISL_9631623 | 10/10/20               |
| EPI_ISL_9631795 | 10/5/20                |
| EPI_ISL_9631804 | 10/5/20                |
| EPI_ISL_9655614 | 10/6/20                |
| EPI_ISL_9655775 | 10/9/20                |

| Accession ID    | Sample Collection Date |
|-----------------|------------------------|
| EPI_ISL_9631647 | 9/17/20                |
| EPI_ISL_9631622 | 10/10/20               |
| EPI_ISL_9655932 | 10/20/20               |
| EPI_ISL_9655913 | 10/12/20               |
| EPI_ISL_9662644 | 10/20/20               |
| EPI_ISL_9662179 | 10/20/20               |
| EPI_ISL_523811  | 3/1/20                 |
| EPI_ISL_523812  | 3/4/20                 |
| EPI_ISL_525467  | 5/5/20                 |
| EPI_ISL_525469  | 5/6/20                 |
| EPI_ISL_525470  | 5/6/20                 |
| EPI_ISL_525471  | 5/6/20                 |
| EPI_ISL_9665221 | 11/12/20               |
| EPI_ISL_9668421 | 11/16/20               |
| EPI_ISL_9670834 | 11/16/20               |
| EPI_ISL_9670835 | 11/16/20               |
| EPI_ISL_9670836 | 11/16/20               |
| EPI_ISL_9670837 | 11/16/20               |
| EPI_ISL_9670838 | 11/18/20               |
| EPI_ISL_9670839 | 11/19/20               |
| EPI_ISL_9670840 | 11/20/20               |
| EPI_ISL_9670841 | 11/24/20               |
| EPI_ISL_9670842 | 11/24/20               |
| EPI_ISL_9670843 | 11/24/20               |
| EPI_ISL_9670887 | 11/24/20               |
| EPI_ISL_9670888 | 11/24/20               |
| EPI_ISL_9670889 | 11/25/20               |
| EPI_ISL_9671400 | 11/25/20               |
| EPI_ISL_9671426 | 11/26/20               |
| EPI_ISL_9671427 | 11/26/20               |
| EPI_ISL_9671428 | 11/26/20               |
| EPI_ISL_9671429 | 11/27/20               |
| EPI_ISL_9671756 | 12/1/20                |
| EPI_ISL_9671797 | 12/1/20                |
| EPI_ISL_9671798 | 12/22/20               |
| EPI_ISL_9671799 | 1/26/21                |
| EPI_ISL_9671800 | 1/29/21                |
| EPI_ISL_9671801 | 1/29/21                |
| EPI_ISL_9671802 | 1/29/21                |

| Accession ID    | Sample Collection Date |
|-----------------|------------------------|
| EPI_ISL_9671803 | 1/29/21                |
| EPI_ISL_9671804 | 1/29/21                |
| EPI_ISL_9671805 | 1/29/21                |
| EPI_ISL_9671841 | 1/29/21                |
| EPI_ISL_9671865 | 2/3/21                 |
| EPI_ISL_9671866 | 2/5/21                 |
| EPI_ISL_9671867 | 2/8/21                 |
| EPI_ISL_9671868 | 2/15/21                |
| EPI_ISL_9671869 | 2/15/21                |
| EPI_ISL_9671870 | 2/16/21                |
| EPI_ISL_9671872 | 2/16/21                |
| EPI_ISL_9671873 | 2/16/21                |
| EPI_ISL_9671874 | 2/23/21                |
| EPI_ISL_9671875 | 2/25/21                |
| EPI_ISL_9671876 | 2/16/21                |
| EPI_ISL_9708671 | 10/14/21               |
| EPI_ISL_9708672 | 10/14/21               |
| EPI_ISL_9708673 | 10/15/21               |
| EPI_ISL_9708674 | 10/15/21               |
| EPI_ISL_9708675 | 10/18/21               |
| EPI_ISL_9708676 | 10/18/21               |
| EPI_ISL_9708677 | 10/18/21               |
| EPI_ISL_9799169 | 1/25/22                |
| EPI_ISL_9802238 | 11/30/21               |
| EPI_ISL_9802239 | 12/2/21                |
| EPI_ISL_9802240 | 12/13/21               |
| EPI_ISL_9802241 | 12/2/21                |
| EPI_ISL_9802242 | 12/13/21               |
| EPI_ISL_9802243 | 12/2/21                |
| EPI_ISL_9802244 | 12/13/21               |
| EPI_ISL_9802245 | 12/15/21               |
| EPI_ISL_9802246 | 12/6/21                |
| EPI_ISL_9802247 | 12/20/21               |
| EPI_ISL_9802248 | 12/20/21               |
| EPI_ISL_9802249 | 12/20/21               |
| EPI_ISL_9802250 | 12/20/21               |
| EPI_ISL_9802251 | 12/27/21               |
| EPI_ISL_9802252 | 12/27/21               |
| EPI_ISL_9802253 | 12/21/21               |

| Accession ID    | Sample Collection Date |
|-----------------|------------------------|
| EPI_ISL_9802254 | 12/21/21               |
| EPI_ISL_9802255 | 12/27/21               |
| EPI_ISL_9802256 | 12/27/21               |
| EPI_ISL_9802257 | 12/27/21               |
| EPI_ISL_9802258 | 12/27/21               |
| EPI_ISL_9802259 | 12/27/21               |
| EPI_ISL_9802260 | 12/27/21               |
| EPI_ISL_9802261 | 12/23/21               |
| EPI_ISL_9802262 | 12/27/21               |
| EPI_ISL_9802263 | 12/27/21               |
| EPI_ISL_9802264 | 12/23/21               |
| EPI_ISL_9802265 | 12/23/21               |
| EPI_ISL_9802266 | 12/27/21               |
| EPI_ISL_9802267 | 12/27/21               |
| EPI_ISL_9802268 | 12/27/21               |
| EPI_ISL_9802269 | 12/27/21               |
| EPI_ISL_9802270 | 12/27/21               |
| EPI_ISL_9802271 | 12/27/21               |
| EPI_ISL_9802272 | 12/27/21               |
| EPI_ISL_9802273 | 12/27/21               |
| EPI_ISL_9802274 | 12/27/21               |
| EPI_ISL_9802275 | 12/27/21               |
| EPI_ISL_9802276 | 12/27/21               |
| EPI_ISL_9802277 | 12/23/21               |
| EPI_ISL_9802278 | 12/23/21               |
| EPI_ISL_9802279 | 12/27/21               |
| EPI_ISL_9802280 | 12/27/21               |
| EPI_ISL_9802281 | 12/27/21               |
| EPI_ISL_9802282 | 12/27/21               |
| EPI_ISL_9802283 | 12/28/21               |
| EPI_ISL_9802284 | 12/28/21               |
| EPI_ISL_9802285 | 12/27/21               |
| EPI_ISL_9802286 | 12/27/21               |
| EPI_ISL_9802287 | 12/27/21               |
| EPI_ISL_9802288 | 12/28/21               |
| EPI_ISL_9802289 | 12/28/21               |
| EPI_ISL_9802290 | 12/27/21               |
| EPI_ISL_9802291 | 12/28/21               |
| EPI_ISL_9802292 | 12/27/21               |

| Accession ID    | Sample Collection Date |
|-----------------|------------------------|
| EPI_ISL_9802293 | 12/28/21               |
| EPI_ISL_9802294 | 12/28/21               |
| EPI_ISL_9802295 | 12/28/21               |
| EPI_ISL_9802296 | 12/29/21               |
| EPI_ISL_9802297 | 12/29/21               |
| EPI_ISL_9802298 | 12/29/21               |
| EPI_ISL_9802299 | 12/29/21               |
| EPI_ISL_9802300 | 12/29/21               |
| EPI_ISL_9802301 | 12/29/21               |
| EPI_ISL_9802302 | 12/28/21               |
| EPI_ISL_9802303 | 12/29/21               |
| EPI_ISL_9802304 | 12/28/21               |
| EPI_ISL_9802305 | 12/28/21               |
| EPI_ISL_9802306 | 12/28/21               |
| EPI_ISL_9802307 | 12/28/21               |
| EPI_ISL_9802308 | 12/28/21               |
| EPI_ISL_9802309 | 12/28/21               |
| EPI_ISL_9802310 | 12/29/21               |
| EPI_ISL_9882176 | 1/22/22                |
| EPI_ISL_9882177 | 2/2/22                 |
| EPI_ISL_9882178 | 2/2/22                 |
| EPI_ISL_9882179 | 2/2/22                 |
| EPI_ISL_9882180 | 2/2/22                 |
| EPI_ISL_9882181 | 2/2/22                 |
